# Supplementary material for: Choice and Constraint in the Negotiation of the Grandparent Role: A Mixed-Methods Study
Source: PubMed Central journal article supplement — Gerontol Geriatr Med. 2018 Jan 15;4:2333721417750944. doi: 10.1177/2333721417750944 (PMC5774728; doi:10.1177/2333721417750944), 2018-01-15

Supplementary Figure 1 Distribution of numbers of hours of grandchild care in the last month provided by grandparents who provided at least 1 hour of grandchild care. The Irish Longitudinal Study on Ageing

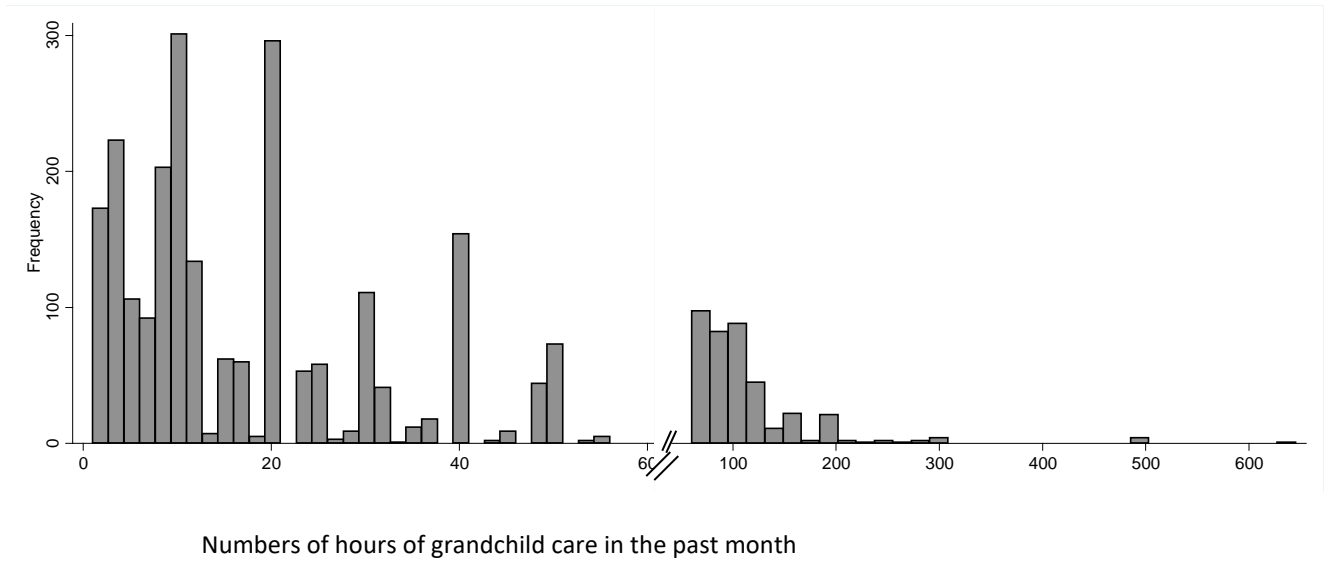

Supplement: Supplementary_Figure_1.pdf [file Supplementary_Figure_1.pdf]
