# Supplementary material for: Choice and Constraint in the Negotiation of the Grandparent Role: A Mixed-Methods Study
Source: PubMed Central journal article supplement — Gerontol Geriatr Med. 2018 Jan 15;4:2333721417750944. doi: 10.1177/2333721417750944 (PMC5774728; doi:10.1177/2333721417750944), 2018-01-15
Supplement: Supplementary_Table_1.pdf [file Supplementary_Table_1.pdf]

Supplementary Table 1 Linear Regression results for Quality of life and selected characteristics

|                                                             | $\beta$ Coefficient | 95 % Confidence intervals |
|-------------------------------------------------------------|---------------------|---------------------------|
| <b>Education<sup>a</sup></b>                                |                     |                           |
| Secondary                                                   | 1.096**             | (0.458, 1.734)            |
| Tertiary                                                    | 1.052**             | (0.350, 1.754)            |
|                                                             |                     |                           |
| <b>Grandchild care<sup>b</sup></b>                          |                     |                           |
| Low intensity (1-59 hours)                                  | 0.766**             | (0.190, 1.343)            |
| High intensity (60+ hours)                                  | 0.671               | (-0.371, 1.714)           |
|                                                             |                     |                           |
| <b>Active social participation in last week<sup>c</sup></b> |                     |                           |
| Yes                                                         | 3.389***            | (2.439, 4.340)            |

Model was adjusted for age, age2, gender, marital status, employment, income and disability;  $F(18, 2352) = 29.15$ ,  $p < 0.001$ ,  $R^2 = 0.176$ . SE adjusted for 2352 clusters in households and weighted for SCQ completion; P values, \*\* $< 0.01$ , \*\*\* $< 0.001$ .

a. Reference group= primary education

b. Reference group=no grandchild care

c. Reference group=no
