# Supplementary material for: Choice and Constraint in the Negotiation of the Grandparent Role: A Mixed-Methods Study
Source: PubMed Central journal article supplement — Gerontol Geriatr Med. 2018 Jan 15;4:2333721417750944. doi: 10.1177/2333721417750944 (PMC5774728; doi:10.1177/2333721417750944), 2018-01-15
Supplement: Supplementary_Table_2.pdf [file Supplementary_Table_2.pdf]

Supplementary Table 2 Linear Regression results for depressive symptoms and selected characteristics

|                                                             | $\beta$ Coefficient | 95 % Confidence intervals |
|-------------------------------------------------------------|---------------------|---------------------------|
| <b>Education<sup>a</sup></b>                                |                     |                           |
| Secondary                                                   | -1.035***           | (-1.566, -0.504)          |
| Tertiary                                                    | -0.636*             | (-1.262, -0.010)          |
|                                                             |                     |                           |
| <b>Grandchild care<sup>b</sup></b>                          |                     |                           |
| Low intensity (1-59 hours)                                  | -0.149              | (-0.634, 0.335)           |
| High intensity (60+ hours)                                  | 0.091               | (-0.856, 1.037)           |
|                                                             |                     |                           |
| <b>Active social participation in last week<sup>c</sup></b> |                     |                           |
| Yes                                                         | -1.918***           | (-2.755, -1.081)          |

Model was adjusted for age, age2, gender, marital status, employment, income and disability;  $F(18, 2713) = 21.15, p < 0.001, R^2 = 0.140$ . SE adjusted for 2714 clusters in households and weighted for SCQ completion. P values, \* $<0.05$ , \*\*\* $<0.001$ .

a. Reference group= primary education

b. Reference group=no grandchild care

c. Reference group=no
